# Supplementary material for: More than a ligand: PD-L1 promotes oncolytic virus infection via a metabolic shift that inhibits the type I interferon pathway
Source: bioRxiv or medRxiv preprint supplement (doi:10.1101/2022.08.31.506095), 2022-09-03
Supplement: Supplementary file [file media-1.pdf]

1 SUPPLEMENTARY MATERIAL

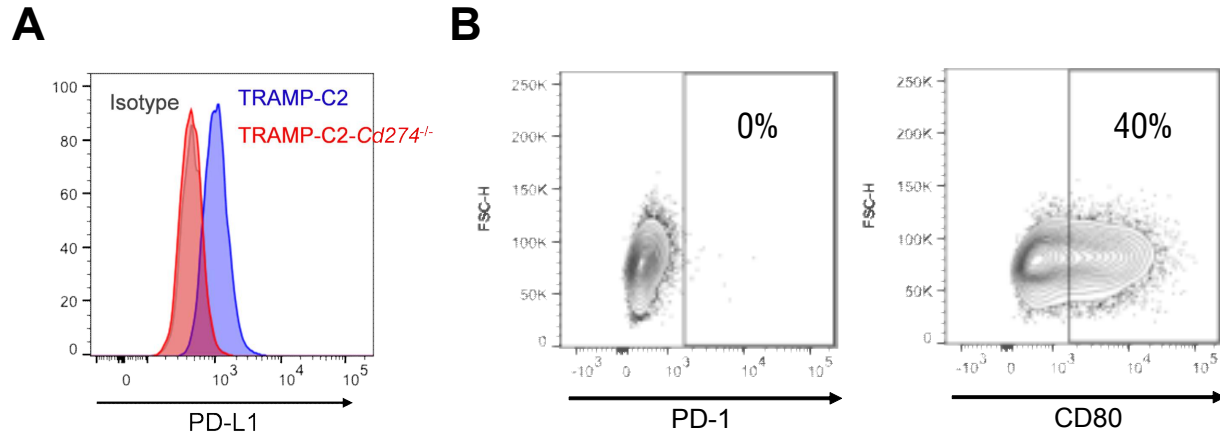

FIGURE S1

2

3 **Figure S1: PD-L1 engagement promotes oncolytic virus infection.** (A) TRAMP-C2 cells (blue)  
4 were transfected with Cas9 and gRNA targeting PD-L1 to generate TRAMP-C2-*Cd274*<sup>-/-</sup> (red). A  
5 representative plot depicting PD-L1 expression is shown. (B) Expression of PD-1 and CD80 in  
6 TRAMP-C2 cells. Representative flow plots are shown.

7

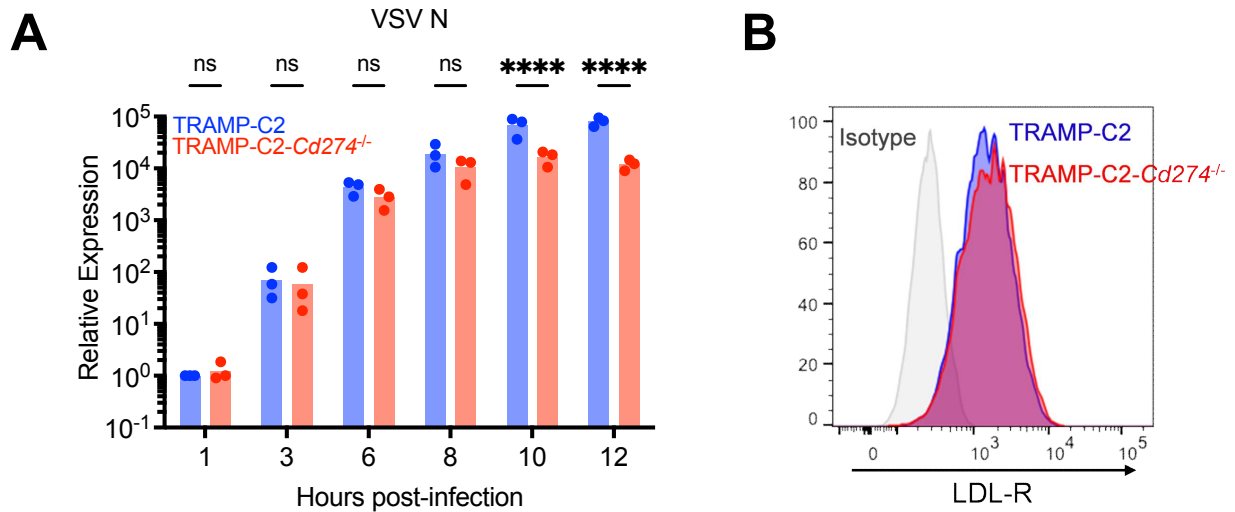

FIGURE S2

9

10 **Figure S2: PD-L1 does not regulate viral entry.** (A) TRAMP-C2 or TRAMP-C2-*Cd274*<sup>-/-</sup> were  
 11 infected with VSV $\Delta$ 51-YFP at MOI 0.1, and RNA collected at indicated times post-infection for  
 12 qPCR analysis of the viral nucleocapsid (N) transcript. n=3 biological replicates depicted.  
 13 Statistical analysis by two-way ANOVA with Šídák's correction for multiple comparisons. (B)  
 14 Expression of the VSV entry receptor LDL-R in TRAMP-C2 (blue) or TRAMP-C2-*Cd274*<sup>-/-</sup> (red)  
 15 cells. Representative histograms are shown.

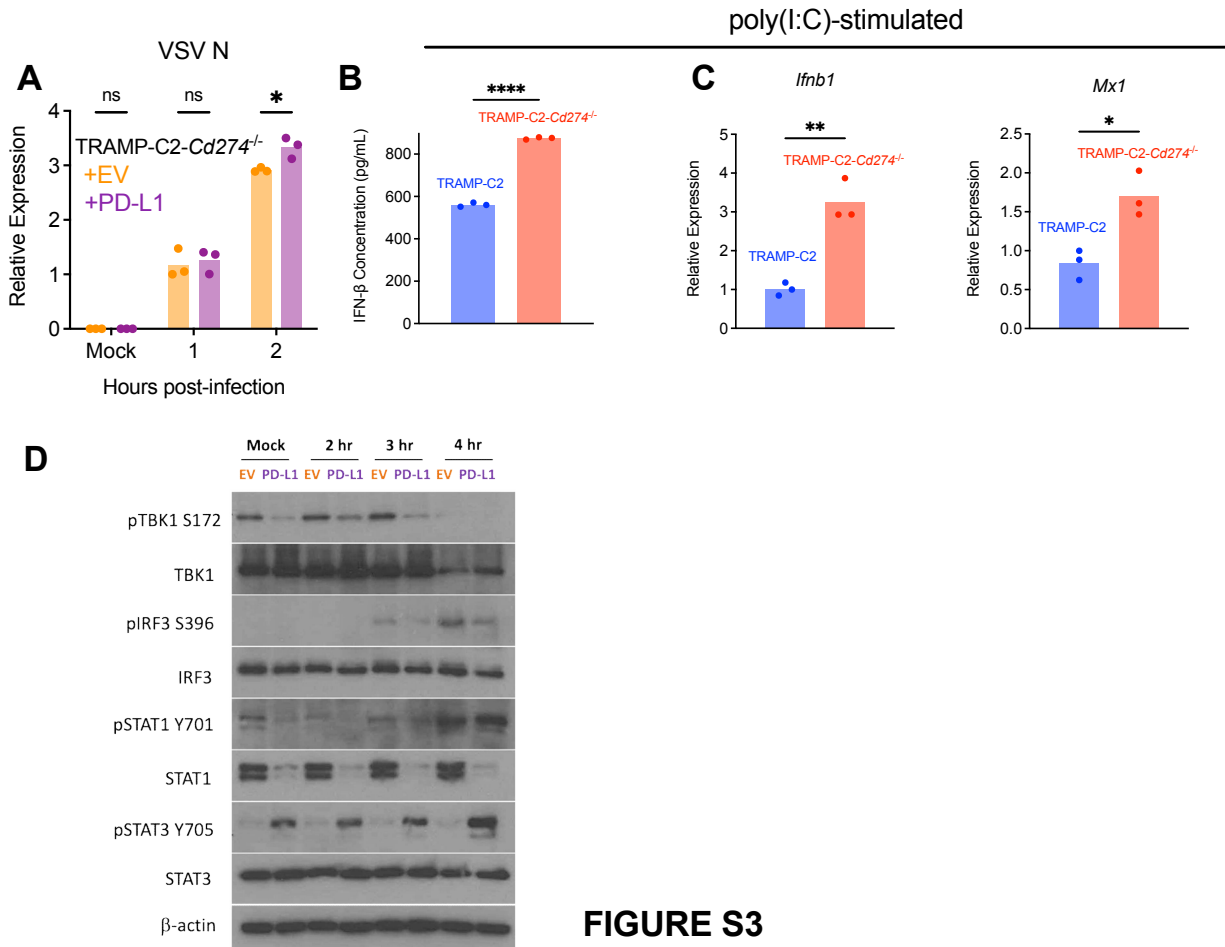

**FIGURE S3**

16

17 **Figure S3: PD-L1 inhibits the type I interferon response to oncolytic viruses. (A)**

18 TRAMP-C2-*Cd274*<sup>-/-</sup> cells transduced with PD-L1 or empty vector were infected with

19 VSVΔ51-YFP at MOI 0.1 and analyzed by qPCR at indicated times post-infection to quantify viral

20 N transcripts. The data depicted are representative of 3 performed with similar results. Statistical

21 analysis by two-way ANOVA with Šídák's correction for multiple comparisons. (**B** and **C**) Cells

22 were transfected with 1 ug of poly(I:C) for 8 hours prior to quantification of IFN-β (by ELISA, B)

23 and IFN-β and MX1 transcripts (by qPCR, C). The experiments depicted are representative of 3

24 performed with similar results. Statistical analysis by two-tailed unpaired Student's t-test. (**D**)

25 TRAMP-C2-*Cd274*<sup>-/-</sup> cells transduced with PD-L1 or empty vector were infected with

26 VSV $\Delta$ 51-YFP at MOI 0.1 and analyzed by western blotting at indicated times post-infection. The  
27 images depicted are representative of 3 performed with similar results.  
28

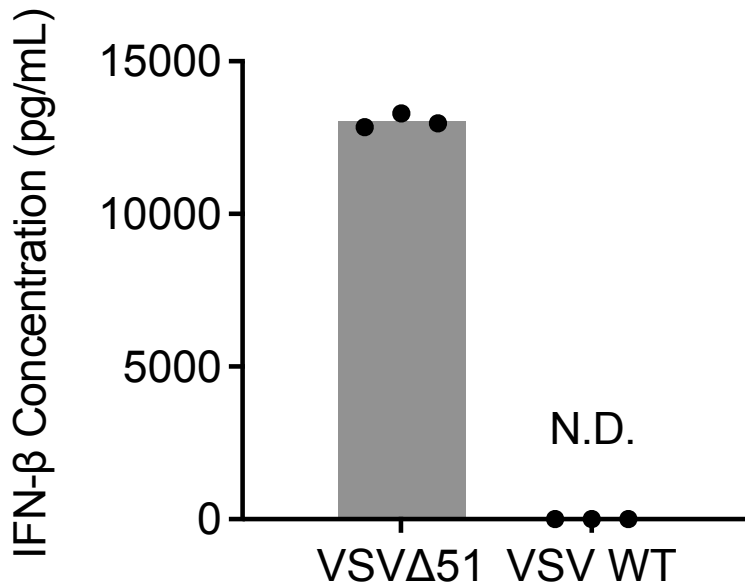

## FIGURE S4

30

31 **Figure S4: VSV WT efficiently blocks type I IFN responses.** TRAMP-C2 cells were infected  
32 with VSVΔ51-YFP or VSV WT at MOI 0.1 for 12 hours prior to analysis by ELISA to quantify  
33 IFN-β in supernatant. The experiment depicted is representative of 2 performed with similar  
34 results. N.D. = not detected.

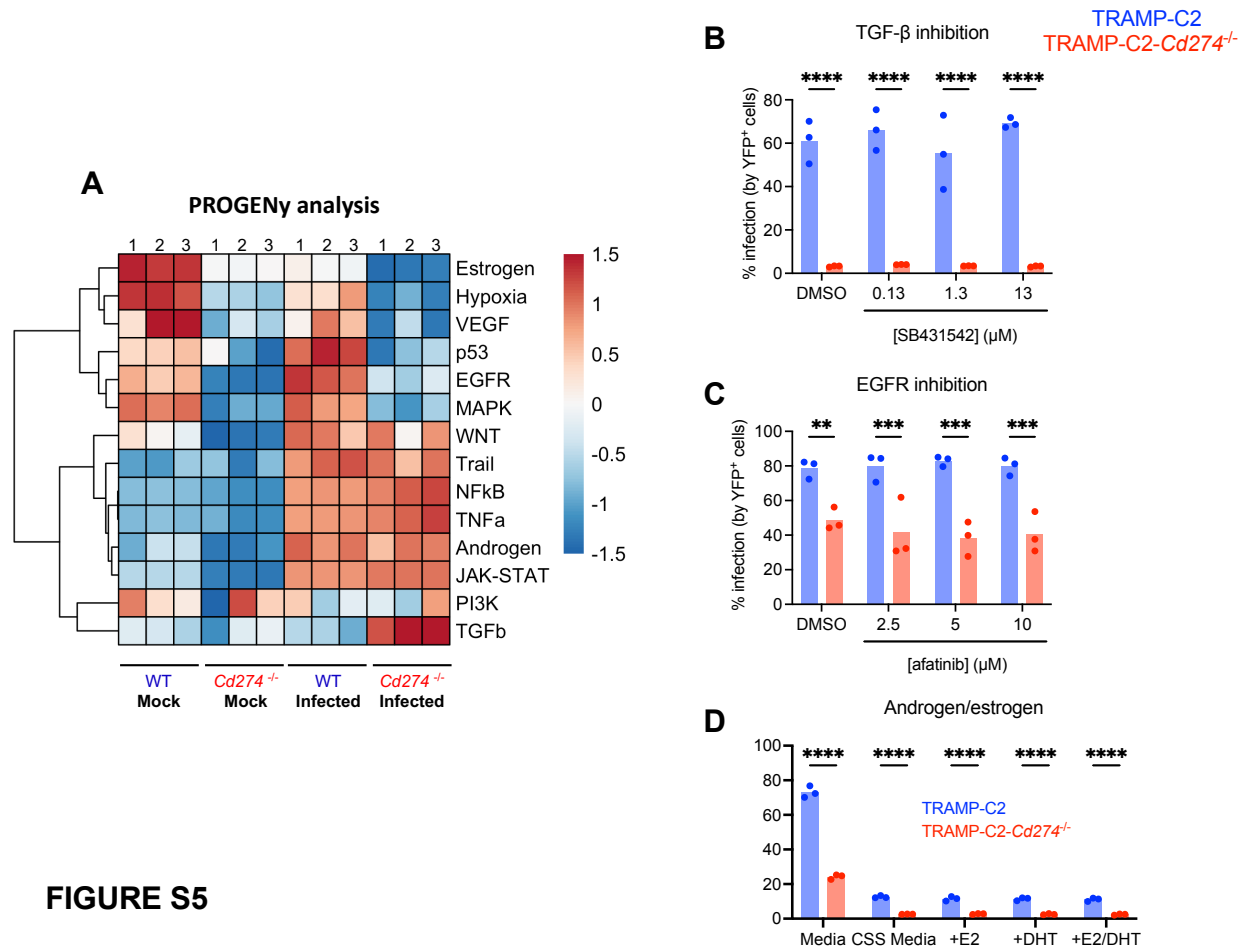

**FIGURE S5**

35

36 **Figure S5: TGF-β, EGFR, and androgen/estrogen pathways are not involved in PD-L1's**

37 **promotion of viral infection. (A)** PROGENy pathway analysis of bulk RNA-seq performed on

38 TRAMP-C2 and TRAMP-C2-*Cd274*<sup>-/-</sup> either mock-infected or infected with VSVΔ51-YFP at

39 MOI 0.1 for 8 hours (3 biological replicates per condition). **(B-C)** TRAMP-C2 and TRAMP-C2-

40 *Cd274*<sup>-/-</sup> cells were pre-treated with the TGF-βRI inhibitor SB431452 for 24 hours **(B)** or the EGFR

41 inhibitor afatinib for 6 hours **(C)** at indicated concentrations (or DMSO as vehicle control),

42 followed by infection with VSVΔ51-YFP at MOI 0.1 for 24 hours prior to analysis by flow

43 cytometry for viral YFP reporter expression. Experiments depicted are representative of 2 with

44 similar results. Statistical analysis by two-way ANOVA with Šídák's correction for multiple

45 comparisons. **(D)** TRAMP-C2 and TRAMP-C2-*Cd274*<sup>-/-</sup> cells were cultured in phenol red-free

46 DMEM supplemented with 10% charcoal-stripped serum (CSS) for 48 hours prior to treatment  
47 with estradiol (E2) or dihydrotestosterone (DHT) for 24 hours. Following that, cells were infected  
48 with VSV $\Delta$ 51-YFP at MOI 0.1 for 24 hours prior to analysis by flow cytometry for viral YFP  
49 reporter expression. Experiments depicted are representative of 2 with similar results. Statistical  
50 analysis by two-way ANOVA with Šídák's correction for multiple comparisons.

51

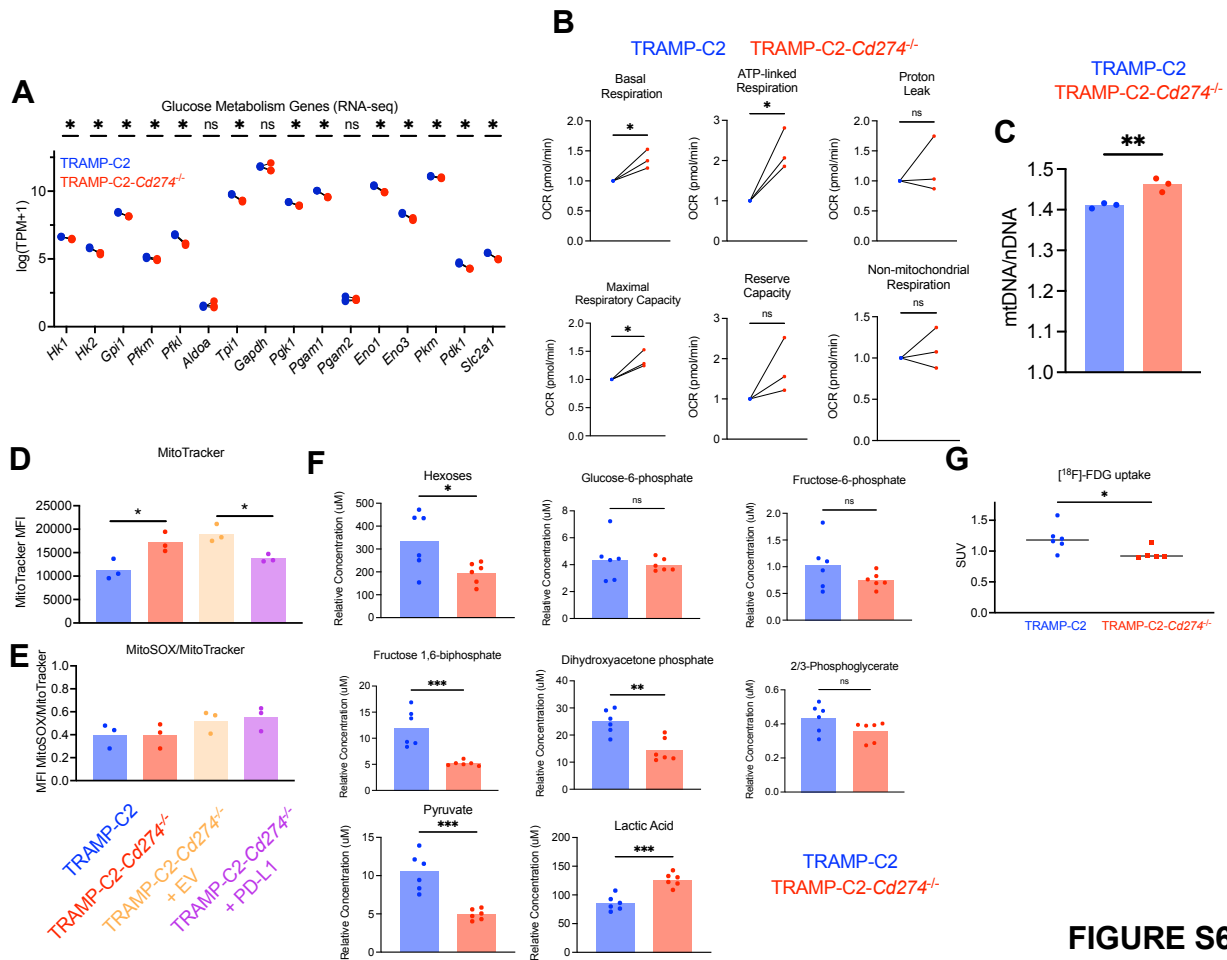

FIGURE S6

53

54 **Figure S6: PD-L1 promotes Warburg metabolism in cancer cells.** (A) Transcripts per million

55 (TPM) for various glycolysis and glucose metabolism enzymes/transporters, from bulk RNA-seq

56 experiment. (B) Cellular respiration parameters calculated using Seahorse mitochondrial stress test

57 data. N=3 biological replicates are shown. For each replicate, data normalized to TRAMP-C2

58 values. Statistical analysis by two-tailed unpaired Student's t-test. (C) Relative quantification of

59 mitochondrial DNA/mtDNA by qPCR (normalized to nuclear DNA/nDNA in each sample), by

60 qPCR analysis. N=3 biological replicates. Statistical analysis by two-tailed unpaired Student's t-

61 test. (D) Mean fluorescence intensity (MFI) of MitoTracker and MitoSOX dyes by flow cytometry

62 for TRAMP-C2, TRAMP-C2-Cd274<sup>-/-</sup>, TRAMP-C2-Cd274<sup>-/-</sup> + EV, and TRAMP-C2-Cd274<sup>-/-</sup> +



63 PD-L1 cells. MitoSOX MFI was corrected for total mitochondrial content by normalizing to  
64 MitoTracker MFI. Statistical analysis by one-way ANOVA with Šídák's correction for multiple  
65 comparisons. (E) Relative abundance of glycolysis metabolites in TRAMP-C2 and TRAMP-C2-  
66 *Cd274<sup>-/-</sup>* cells, measured in the untargeted metabolomics study. 6 biological replicates per cell line.  
67 Statistical analysis by unpaired two-tailed Student's t-test. (F) Male NCG mice were implanted  
68 with subcutaneous TRAMP-C2 or TRAMP-C2-*Cd274<sup>-/-</sup>* tumors. Standardized uptake value (SUV)  
69 of [<sup>18</sup>F]-fluorodeoxyglucose was assessed by PET imaging. Statistical analysis by two-tailed  
70 unpaired Student's t-Test. \*: p<0.05.

71

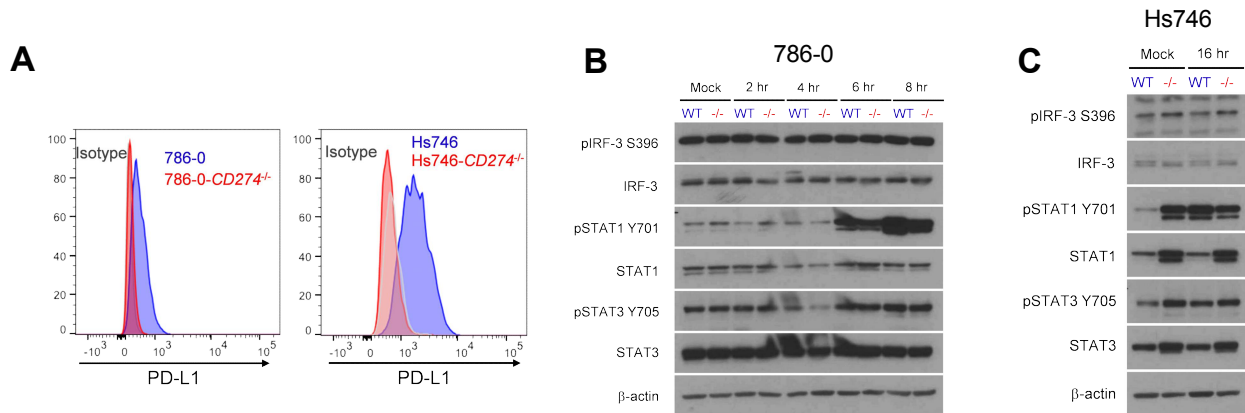

**FIGURE S7**

73

74 **Figure S7: PD-L1 alters type I interferon responses in human cancer cells .** 786-0 (left) and  
 75 Hs746 (right) cells were electroporated with Cas9 and gRNA targeting PD-L1 to generate *CD274*<sup>-/-</sup>  
 76 cells. Representative plots depicting PD-L1 expression are shown. **(B)** 786-0 and  
 77 786-0-*CD274*<sup>-/-</sup> cells infected with VSVΔ51-YFP at MOI 1 (or mock-infected) and analyzed by  
 78 western blotting at indicated times post-infection. Images depicted are representative of 3 with  
 79 similar results. **(C)** Hs746 and Hs746-*CD274*<sup>-/-</sup> cells infected with VSVΔ51-YFP at MOI 0.1 (or  
 80 mock-infected) for 16 hours prior to western blotting analysis. Images depicted are representative  
 81 of 3 with similar results.

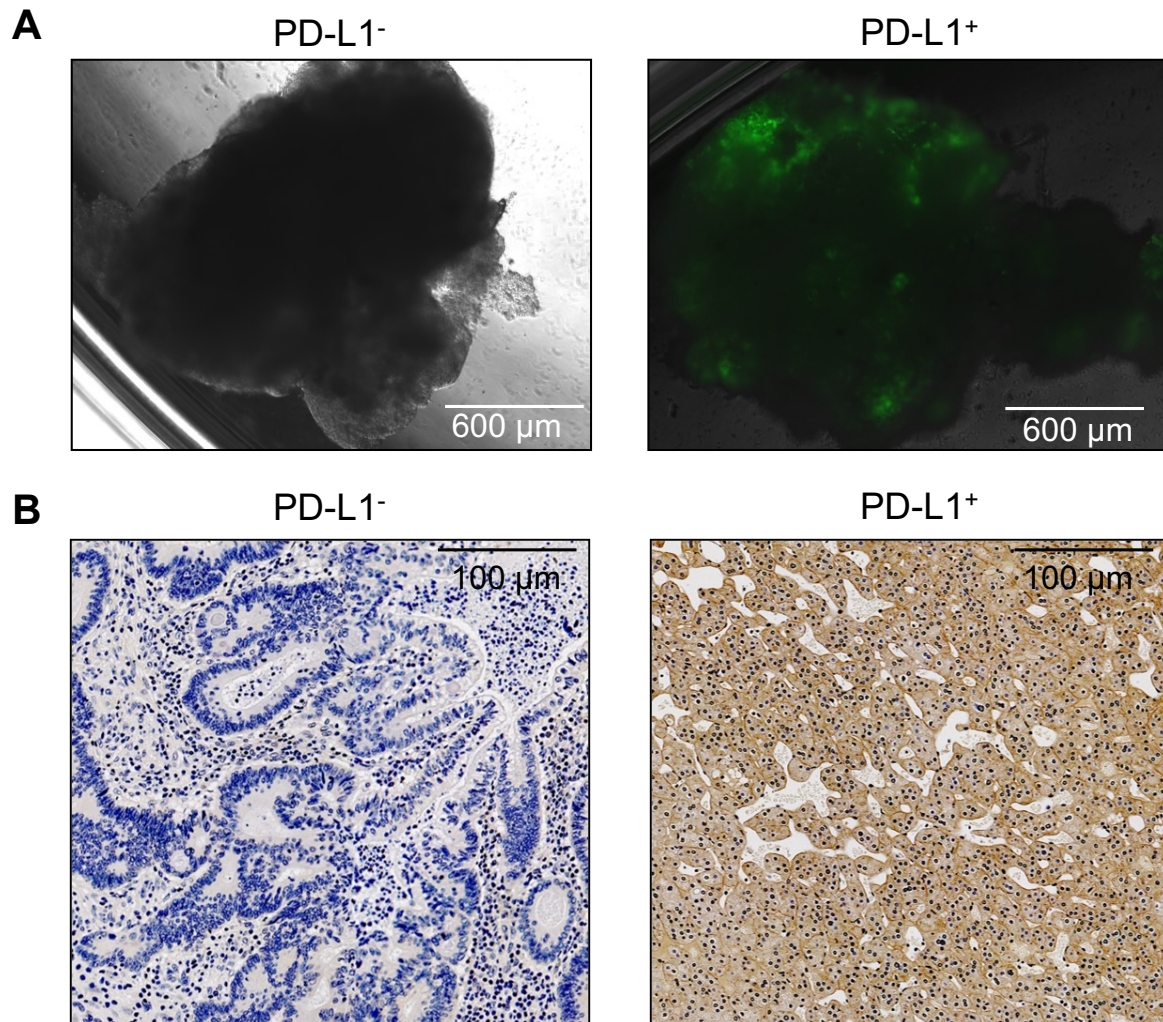

**FIGURE S8**

82

83 **Figure S8: assessment of PD-L1 by immunohistochemistry and oncolytic virus infection by**

84 **fluorescent microscopy.** (A) Fluorescent imaging of tumor explant cores from patient biopsies

85 infected with VSV $\Delta$ 51-YFP for 48 hours prior to imaging for viral YFP reporter. Images of poorly

86 infected (left) and well infected (right) tumors are depicted. (B) Patient tumor biopsies subjected

87 to PD-L1 IHC to determine PD-L1 status of tumors. Images of PD-L1<sup>-</sup> (left) and PD-L1<sup>+</sup> (right)

88 tumors are depicted.

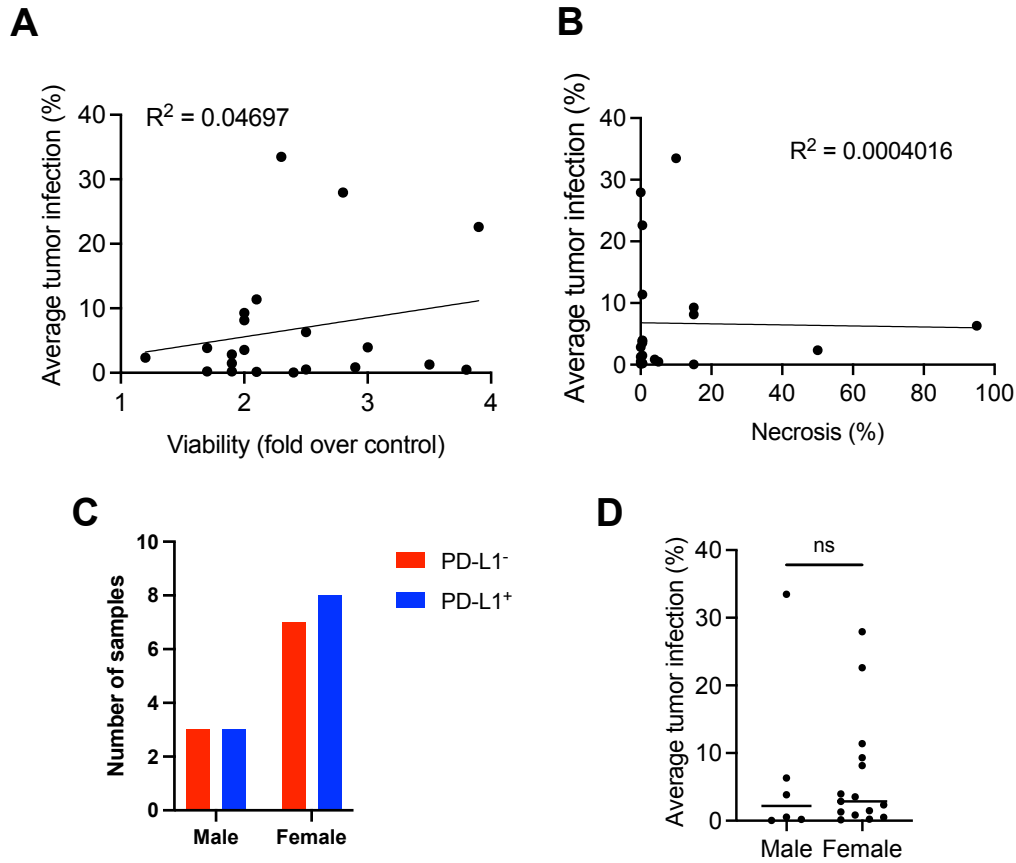

**FIGURE S9**

89

90 **Figure S9: PD-L1 is a biomarker of patient tumors responsive to oncolytic virus. (A-B)**

91 Average tumor infection plotted against viability (assessed by alamarBlue) and necrosis (% of

92 tumor section necrotic, assessed by histology). (C-D) Distribution of PD-L1<sup>+</sup> and PD-L1<sup>-</sup> tumors,

93 and average tumor infection, between male and female donors. Statistical analysis by two-tailed

94 unpaired Student's t-test.

**Table S1.** Metadata for tumor scRNA-seq data analyzed for PD-L1 and glycolysis gene set score.

| Cancer                  | Source                         | Accession                                                                           | Platform                             | Sorted?                    | Patient #<br>(>100 malignant cells) | Total cancer cell #     | % mito threshold |
|-------------------------|--------------------------------|-------------------------------------------------------------------------------------|--------------------------------------|----------------------------|-------------------------------------|-------------------------|------------------|
| Breast                  | Wu <i>et al.</i> (37)          | ENA accession PRJEB35405                                                            | 10x Genomics Chromium (3' v2)        | NA                         | 4                                   | 4452                    | 20%              |
| Breast                  | Qian <i>et al.</i> (28)        | <a href="http://blueprint.lambrechtslab.org">http://blueprint.lambrechtslab.org</a> | 10x Genomics Chromium (3')           | NA                         | 10                                  | 8766                    | 20%              |
| Breast                  | Bassez <i>et al.</i> (38)      | <a href="http://biokey.lambrechtslab.org/">http://biokey.lambrechtslab.org/</a>     | 10x Genomics Chromium (5')           | NA                         | 62                                  | 38,765                  | 15%              |
| Colorectal              | Lee <i>et al.</i> (26)         | GEO Accession GSE144735 & GSE132465                                                 | 10x Genomics Chromium (3' v2)        | NA                         | 25                                  | 18,058                  | 20%              |
| Colorectal              | Uhlitz <i>et al.</i> (27)      | Direct from authors                                                                 | 10x Genomics Chromium (3' v3)        | NA                         | 8                                   | 2659                    | 20%              |
| Colorectal              | Qian <i>et al.</i> (28)        | <a href="http://blueprint.lambrechtslab.org">http://blueprint.lambrechtslab.org</a> | 10x Genomics Chromium (3')           | NA                         | 11                                  | 8766                    | 25%              |
| Gastric                 | Sathe <i>et al.</i> (29)       | <a href="https://dna-discovery.stanford.edu">https://dna-discovery.stanford.edu</a> | 10x Genomics Chromium (3' v2)        | NA                         | 7                                   | 6909                    | 20%              |
| Lung                    | Kim <i>et al.</i> (32)         | GEO Accession GSE131907                                                             | 10x Genomics Chromium (3' v2)        | NA                         | 20                                  | 15,396                  | 20%              |
| Lung                    | Lambrechts <i>et al.</i> (31)  | ArrayExpress Accessions E-MTAB-6149 & E-MTAB-6653                                   | 10x Genomics Chromium (3' v1/v2)     | NA                         | 9                                   | 8036                    | 20%              |
| Lung                    | Qian <i>et al.</i> (28)        | <a href="http://blueprint.lambrechtslab.org">http://blueprint.lambrechtslab.org</a> | 10x Genomics Chromium (3')           | NA                         | 24                                  | 6794                    | 20%              |
| Lung                    | Laughney <i>et al.</i> (24)    | GEO Accession GSE123904                                                             | 10x Genomics Chromium (3' v2)        | Viability (scatter & DAPI) | 8                                   | 3097                    | 20%              |
| Lung                    | Wu <i>et al.</i> (33)          | GEO Accession GSE148071                                                             | GEXSCOPE (Singleron Biotechnologies) | NA                         | 35                                  | 54,052                  | 30%              |
| Nasopharyngeal          | Chen <i>et al.</i> (34)        | GEO Accession GSE150430                                                             | 10x Genomics Chromium (3' v2)        | NA                         | 9                                   | 7400                    | 20%              |
| Ovarian                 | Geistlinger <i>et al.</i> (33) | GEO Accession GSE154600                                                             | 10x Genomics Chromium (3' v2)        | NA                         | 5                                   | 7479                    | 20%              |
| Ovarian                 | Qian <i>et al.</i> (28)        | <a href="http://blueprint.lambrechtslab.org">http://blueprint.lambrechtslab.org</a> | 10x Genomics Chromium (3')           | NA                         | 5                                   | 4967                    | 20%              |
| Pancreatic              | Steele <i>et al.</i> (36)      | GEO Accession GSE155698                                                             | 10x Genomics Chromium (3')           | NA                         | 15                                  | 10,495                  | 20%              |
| Pancreatic              | Peng <i>et al.</i> (54)        | GSA: CRA001160                                                                      | 10x Genomics Chromium (3' v2)        |                            | 24                                  | 41,986 (all cell types) | 10%              |
| Squamous cell carcinoma | Ji <i>et al.</i> (20)          | GEO Accession GSE144236                                                             | 10x Genomics Chromium (3' v2)        | NA                         | 9                                   | 12,154                  | 10%              |

95

96 **Table S1:** Metadata for tumour scRNA-seq data analyzed for PD-L1 expression and glycolysis

97 gene set score.



99 **Table S2: PD-L1 remodeling of the cancer cell metabolome.** Summary of unbiased  
100 metabolomics study performed on cell lysate and culture supernatant from TRAMP-C2 and  
101 TRAMP-C2-*Cd274*<sup>-/-</sup> after 48 hours in culture. All data in units of relative concentration, measured  
102 in  $\mu\text{M}$ . Culture supernatant data corrected using culture media without cells, to determine  
103 production/depletion of media metabolites.  
104

**Table S3.** Summary of patient cohort for PD-L1 biomarker study.

| Sample ID | Sex | Age    | Diagnosis                        | PD-L1 status | Average % infection |
|-----------|-----|--------|----------------------------------|--------------|---------------------|
| 203       | 62  | Female | lung squamous cell carcinoma     | +            | 0.5                 |
| 204       | 83  | Female | endometrial cancer               | -            | 4.0                 |
| 205       | 63  | Male   | papillary renal cell carcinoma   | +            | 33.5                |
| 215       | 57  | Female | ovarian cancer                   | -            | 0.9                 |
| 221       | 67  | Female | endometrial cancer               | +            | 22.6                |
| 223       | 68  | Female | lung cancer                      | +            | 27.9                |
| 224       | 70  | Female | hepatocellular carcinoma         | -            | 1.3                 |
| 225       | 73  | Male   | lung squamous cell carcinoma     | +            | 6.3                 |
| 226       | 48  | Male   | colon adenocarcinoma             | -            | 0.5                 |
| 227       | 74  | Female | lung non-small cell carcinoma    | -            | 2.3                 |
| 241       | 57  | Female | ovarian cancer                   | +            | 0.2                 |
| 242       | 73  | Female | chromophobe renal cell carcinoma | -            | 0.1                 |
| 247       | 62  | Female | colon adenocarcinoma             | +            | 9.3                 |
| 248       | 63  | Female | ovarian cancer                   | -            | 2.9                 |
| 249       | 56  | Male   | dermatofibrosarcoma protuberans  | -            | 0.2                 |
| 253       | 62  | Male   | neuroendocrine tumor             | -            | 3.8                 |
| 257       | 67  | Female | uterine fibroid                  | +            | 3.5                 |
| 260       | 61  | Female | fibrous tumor of the abdomen     | +            | 11.4                |
| 283       | 52  | Female | breast carcinoma                 | +            | 1.5                 |
| 289       | 79  | Female | hepatic adenocarcinoma           | -            | 8.2                 |
| 291       | 59  | Male   | leiomyosarcoma                   | +            | 0.1                 |

105

106 **Table S3: Summary of patient cohort.**

107

108
